# Supplementary material for: A case of bone metastasis of colon cancer that markedly responded to S-1/CPT-11 combination chemotherapy and became curable by resection
Source: Springer Nature journal article supplement (doi:10.1186/1477-7819-4-3), 2006-01-18

**A**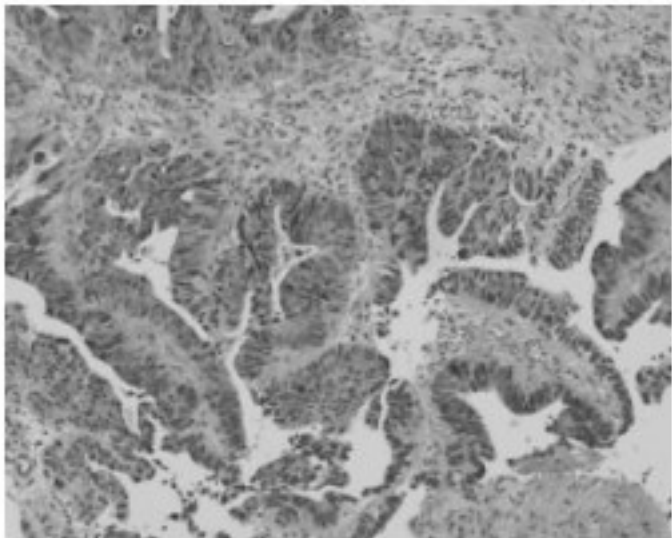**B**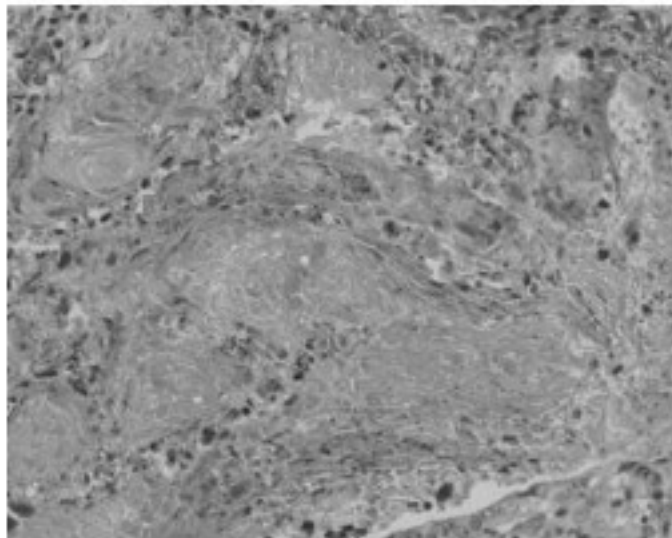

Supplement: 12957_2005_158_MOESM2_ESM.pdf [file 12957_2005_158_MOESM2_ESM.pdf]
